# Supplementary material for: Amyloid Precursor Protein: A Regulatory Hub in Alzheimer's Disease
Source: PubMed Central journal article supplement (PMC10796103; doi:10.14336/ad.2023.0308), 2024-02-01
Supplement: AD-15-1-201-s.pdf [file AD-15-1-201-s.pdf]

SUPPLEMENTARY DATA

# **Amyloid Precursor Protein: A Regulatory Hub in Alzheimer's Disease**

**Jiang Chen, Jun-Sheng Chen, Song Li, Fengning Zhang, Jie Deng, Ling-Hui Zeng, Jun Tan**

# SUPPLEMENTARY DATA

**Supplementary Table 1.** The three-dimension structural domains of amyloid precursor protein and their functions.

| Domain               | Structural Features                                                                                                                                                                            | Functional Characteristics                                                                                                     | References          |
|----------------------|------------------------------------------------------------------------------------------------------------------------------------------------------------------------------------------------|--------------------------------------------------------------------------------------------------------------------------------|---------------------|
| Extracellular Domain | Copper-binding domain: small $\beta$ -sheet and helix; Heparin-binding domain: $\beta$ -sheet and flexible loop; Growth factor-like domain: $\beta$ -sheet and short $\alpha$ -helix           | Regulates APP function and interaction with other proteins and extracellular matrix components                                 | [241], [242], [243] |
| Transmembrane Domain | Single-pass $\alpha$ -helix spanning the cell membrane; amphipathic, with hydrophobic residues facing the membrane and hydrophilic residues facing the cytoplasm and extracellular environment | Important for stability and localization of APP within the cell membrane and for interaction with other transmembrane proteins | [244], [245]        |
| Juxtamembrane Domain | Located immediately adjacent to the transmembrane domain; contains a GxxxG motif that promotes dimerization of APP and interaction with other transmembrane proteins                           | Involved in regulation of APP trafficking and processing                                                                       | [37],[246]          |
| Cytoplasmic Domain   | Short and contains several conserved motifs, including the YENPTY motif                                                                                                                        | Regulates APP trafficking and processing and interacts with intracellular signaling molecules                                  | [247]               |
